# Supplementary material for: Infrared thermography applied to lower limb muscles in elite soccer players with functional ankle equinus and non-equinus condition
Source: PubMed Central journal article supplement (PMC5446768; doi:10.7717/peerj.3388), 2017-05-25
Supplement: peerj-05-3388-s002.pdf [file peerj-05-3388-s002.pdf]

| Nombre          | Altura | Peso | Altura | Altura2 | IMC   | Retr. Gemelo derecho |
|-----------------|--------|------|--------|---------|-------|----------------------|
| Luis Lluch      | 1,82   | 81,5 | 1,82   | 3,3124  | 24,6  | no                   |
| Ruben Valverde  | 1,68   | 63   | 1,68   | 2,8224  | 22,32 | no                   |
| David Rodriguez | 1,78   | 70   | 1,78   | 3,1684  | 22,09 | no                   |
| Sergio Hervas   | 1,81   | 70   | 1,81   | 3,2761  | 21,37 | si                   |
| Ricardo         | 1,81   | 74   | 1,81   | 3,2761  | 22,59 | si                   |
| Alberto Perez   | 1,66   | 69,2 | 1,66   | 2,7556  | 25,11 | si                   |
| Salvano         | 1,7    | 67   | 1,7    | 2,89    | 23,18 | si                   |
| Cruz            | 1,78   | 67   | 1,78   | 3,1684  | 21,15 | si                   |
| Saralegui       | 1,89   | 80   | 1,89   | 3,5721  | 22,4  | no                   |
| Leguina         | 1,78   | 71   | 1,78   | 3,1684  | 22,41 | si                   |
| Igor            | 1,83   | 79   | 1,83   | 3,3489  | 23,59 | no                   |
| Roberto         | 1,83   | 77,4 | 1,83   | 3,3489  | 23,11 | si                   |
| Galan           | 1,87   | 83,5 | 1,87   | 3,4969  | 23,88 | no                   |
| Marcos          | 1,86   | 78   | 1,86   | 3,4596  | 22,55 | si                   |
| Borrego         | 1,8    | 75   | 1,8    | 3,24    | 23,15 | si                   |
| Valdes          | 1,77   | 75   | 1,77   | 3,1329  | 23,94 | no                   |
| Gorka Unda      | 1,76   | 73   | 1,76   | 3,0976  | 23,57 | no                   |
| Nevado          | 1,72   | 70   | 1,72   | 2,9584  | 23,66 | si                   |
| Gomez           | 1,85   | 79   | 1,85   | 3,4225  | 23,08 | si                   |
| Cristian        | 1,83   | 80   | 1,83   | 3,3489  | 23,89 | no                   |
| Javi            | 1,85   | 75   | 1,85   | 3,4225  | 21,91 | no                   |

| Retr. Gemelo izquierdo | Retrac gemelo bil | Retr. Soleo derecho | Retr. Soleo izquierdo |
|------------------------|-------------------|---------------------|-----------------------|
| no                     | no                | no                  | no                    |
| no                     | no                | no                  | no                    |
| no                     | no                | no                  | no                    |
| si                     | si                | si                  | si                    |
| si                     | si                | si                  | si                    |
| si                     | si                | si                  | si                    |
| si                     | si                | si                  | si                    |
| si                     | si                | si                  | si                    |
| no                     | no                | no                  | no                    |
| si                     | si                | si                  | si                    |
| no                     | no                | no                  | no                    |
| si                     | si                | si                  | si                    |
| no                     | no                | no                  | no                    |
| si                     | si                | si                  | si                    |
| si                     | si                | si                  | si                    |
| no                     | no                | no                  | no                    |
| no                     | no                | no                  | no                    |
| si                     | si                | si                  | si                    |
| si                     | si                | si                  | si                    |
| no                     | no                | no                  | no                    |
| no                     | no                | no                  | no                    |

| Retrac soleo bil | Temperatura Tibial | Temperatura Tibial | Temperatura tibial anterior m |
|------------------|--------------------|--------------------|-------------------------------|
| no               | 24,3               | 31,8               | 30,8                          |
| no               | 26,4               | 32,5               | 31,6                          |
| no               | 28                 | 32,5               | 31,7                          |
| si               | 30                 | 32,7               | 32                            |
| si               | 29,5               | 32,3               | 31,2                          |
| si               | 30                 | 32,7               | 31,8                          |
| si               | 28,7               | 31,4               | 30,4                          |
| si               | 28,3               | 31,2               | 30,3                          |
| no               | 26,3               | 30,4               | 29,6                          |
| si               | 28,8               | 32                 | 31,4                          |
| no               | 31                 | 33,1               | 32,2                          |
| si               | 31,1               | 33,2               | 32,4                          |
| no               | 31,8               | 33,8               | 33                            |
| si               | 29,9               | 31,4               | 30,5                          |
| si               | 29,8               | 31,6               | 31,1                          |
| no               | 28,6               | 32,9               | 31,8                          |
| no               | 30,6               | 33,7               | 33                            |
| si               | 27,7               | 30,8               | 30                            |
| si               | 29                 | 30                 | 29,5                          |
| no               | 28,8               | 32,5               | 31,7                          |
| no               | 28,2               | 30                 | 29,2                          |

Temperatura Tibial Anterior minima iz Temperatura Tibial Anterior maxima iz Temperatura Tibial Anterior n

|      |      |      |
|------|------|------|
| 22,8 | 33,2 | 30,7 |
| 28,6 | 32,2 | 31,3 |
| 28,5 | 32,2 | 31,5 |
| 29   | 31,5 | 30   |
| 28,7 | 31,4 | 30,7 |
| 29,6 | 31,5 | 30,7 |
| 27,7 | 30,5 | 29,4 |
| 28,9 | 31,7 | 30,7 |
| 28,8 | 30   | 29,5 |
| 30,7 | 32,7 | 31,7 |
| 30,9 | 32   | 31,3 |
| 31,1 | 32,5 | 31,9 |
| 31,5 | 33,6 | 33   |
| 30,6 | 31,4 | 31   |
| 29,8 | 31,4 | 31   |
| 29,4 | 31,5 | 30,8 |
| 31,4 | 33,3 | 32,8 |
| 29,9 | 31,3 | 30,7 |
| 29,5 | 31   | 30,4 |
| 30   | 32,6 | 31,7 |
| 27,1 | 29,6 | 29   |

temperatura gemelo izquierdi temperatura gemelo izquierdo maximo a temperatura gemelo izquierdo

|      |      |      |
|------|------|------|
| 27,5 | 32,4 | 30,8 |
| 27   | 31,5 | 30,5 |
| 28,5 | 30,1 | 29,3 |
| 29,4 | 32,5 | 30,9 |
| 28,9 | 30,5 | 29,6 |
| 28,6 | 30,9 | 30   |
| 25,9 | 29,2 | 27,7 |
| 25,9 | 31,7 | 30,6 |
| 29,8 | 31,2 | 30,6 |
| 29,1 | 31,2 | 29,8 |
| 29,8 | 30,6 | 30,3 |
| 30,8 | 31,7 | 31,4 |
| 27,4 | 31,8 | 30,3 |
| 28,9 | 30,5 | 30,1 |
| 29,8 | 31   | 30,6 |
| 29,3 | 31,2 | 30,6 |
| 30,3 | 32,3 | 31,6 |
| 29,4 | 31   | 30   |
| 26,8 | 29,5 | 28,3 |
| 29,9 | 31,3 | 30,3 |
| 26,7 | 28   | 27,2 |

temperatura gemelo min temperatura gemelo maximo derecho a temperatura gemelo media de

|      |      |      |
|------|------|------|
| 25,9 | 32,8 | 30,6 |
| 29,5 | 31,1 | 30,4 |
| 28,5 | 30,1 | 29,1 |
| 29,7 | 32,4 | 31,2 |
| 28,5 | 30,6 | 29,6 |
| 30,1 | 31,1 | 30,7 |
| 26,7 | 29   | 27,8 |
| 27,9 | 31,3 | 30,3 |
| 29,5 | 31   | 30,2 |
| 28,8 | 30,2 | 29,6 |
| 29,5 | 30,7 | 30,3 |
| 30,5 | 32,2 | 31,7 |
| 29,5 | 31,8 | 30,3 |
| 29,9 | 30,7 | 30,2 |
| 29,3 | 31   | 30,1 |
| 29,4 | 31   | 30,5 |
| 30,4 | 32,1 | 31,4 |
| 28,3 | 30,3 | 29,4 |
| 27,9 | 29,6 | 28,5 |
| 29,3 | 32,5 | 30,7 |
| 23,8 | 30   | 27,9 |

temperatura tendon aqui temperatura tendon aquiles n temperatura t temperatura t temperatura t

|      |      |      |      |      |
|------|------|------|------|------|
| 16,7 | 31,2 | 25,7 | 19,7 | 31,5 |
| 19,5 | 28,5 | 25,4 | 19,7 | 30,5 |
| 20,7 | 29,2 | 25,9 | 22,1 | 28,7 |
| 22,6 | 30,6 | 26,6 | 21,9 | 28,5 |
| 21,7 | 28,5 | 26,2 | 22,3 | 28,9 |
| 24,3 | 30,9 | 28,8 | 22,5 | 30,7 |
| 21,7 | 27,8 | 24,4 | 22,5 | 26   |
| 22,6 | 28,3 | 26,8 | 23,8 | 29,3 |
| 21,2 | 26,9 | 24,3 | 21,7 | 27,1 |
| 23,5 | 27,2 | 25,8 | 23,5 | 28,1 |
| 23,2 | 28,2 | 27   | 22,1 | 28,6 |
| 24,5 | 30,2 | 28,6 | 23,1 | 30,9 |
| 25,4 | 31,1 | 28,7 | 27   | 31,5 |
| 24,2 | 29,1 | 27,6 | 25,1 | 31,3 |
| 30,2 | 31,2 | 30,7 | 22,3 | 28,5 |
| 24,7 | 29,6 | 28,1 | 24,9 | 30,1 |
| 25,3 | 31,6 | 28,1 | 25,7 | 31,2 |
| 22,5 | 29,8 | 26,3 | 21,4 | 29,5 |
| 21,6 | 25,1 | 23,9 | 22   | 28,4 |
| 20,5 | 29,6 | 25,8 | 22   | 30   |
| 23,4 | 29,5 | 26,3 | 25,4 | 31,2 |

| temperatura tendo | Temperatura Tibial | Temperatura Tibial | Temperatura tibial anterior m |
|-------------------|--------------------|--------------------|-------------------------------|
| 26,3              | 28,1               | 31,5               | 29,6                          |
| 25,3              | 28,4               | 32,4               | 32,1                          |
| 25,6              | 29                 | 31,5               | 30,8                          |
| 27,3              | 29,6               | 33,8               | 32,6                          |
| 26,5              | 29,9               | 32,3               | 30,9                          |
| 27,9              | 28,5               | 31,6               | 29,5                          |
| 25                | 26,9               | 29,6               | 28,3                          |
| 27,3              | 27,5               | 32,2               | 30,7                          |
| 23,9              | 27,2               | 29,1               | 28,4                          |
| 26,1              | 29,7               | 32,1               | 31,2                          |
| 26,2              | 27,9               | 30,1               | 29,5                          |
| 29                | 28,6               | 30,7               | 29,5                          |
| 29,9              | 26,5               | 29,3               | 28,1                          |
| 28,8              | 29,9               | 31,9               | 30,6                          |
| 25,2              | 22,3               | 26,9               | 25,1                          |
| 31,3              | 28,6               | 31,9               | 30,4                          |
| 28                | 25,5               | 31,2               | 28,8                          |
| 26,1              | 29,1               | 31,7               | 30,8                          |
| 24,3              | 29                 | 31,3               | 30,1                          |
| 26                | 27,4               | 30,2               | 28,6                          |
| 27,8              | 28,9               | 31,3               | 31,3                          |



Temperatura Tibial Anterior minima iz Temperatura Tibial Anterior maxima iz Temperatura Tibial Anterior n

|      |      |      |
|------|------|------|
| 26,1 | 30,8 | 29,1 |
| 29,4 | 32,5 | 32,2 |
| 26,2 | 32   | 31   |
| 29,9 | 34,1 | 31,9 |
| 29,1 | 31,2 | 30,4 |
| 28,8 | 29,1 | 28,7 |
| 27,4 | 30,1 | 28,7 |
| 29,5 | 32   | 31   |
| 27,5 | 28,9 | 28,3 |
| 29,2 | 31,9 | 30,8 |
| 29,8 | 32   | 31,5 |
| 29,6 | 31,3 | 30,6 |
| 24,5 | 29,1 | 26,7 |
| 30,8 | 32,3 | 32,3 |
| 26,8 | 29,9 | 29,1 |
| 28,4 | 31,1 | 29,9 |
| 27,5 | 30,6 | 29,2 |
| 29,7 | 32,1 | 31,2 |
| 29,2 | 32,1 | 30,9 |
| 25,1 | 30   | 27,9 |
| 28,1 | 29,9 | 29,3 |

temperatura gemelo izquierd temperatura gemelo izquierdo maximo d temperatura gemelo izquierd

|      |      |      |
|------|------|------|
| 29,7 | 31,8 | 31   |
| 30,3 | 32,3 | 31,3 |
| 28,1 | 31,5 | 29,3 |
| 29,4 | 32,8 | 31,3 |
| 27,5 | 30,4 | 28,8 |
| 27,9 | 29,7 | 28,9 |
| 25,3 | 28,9 | 26,9 |
| 31,4 | 32,6 | 32   |
| 27,9 | 29,3 | 29,1 |
| 29,1 | 31,1 | 30   |
| 29,3 | 30   | 29,7 |
| 29,9 | 32,3 | 31,2 |
| 26,6 | 28,9 | 29,6 |
| 29,7 | 33,4 | 31,4 |
| 29,4 | 31,5 | 30,6 |
| 29,1 | 31,5 | 30,2 |
| 28   | 31,5 | 29,8 |
| 30,7 | 32,1 | 31,1 |
| 29,1 | 30,3 | 29,5 |
| 25,7 | 28,7 | 26,6 |
| 26,9 | 29,1 | 28,1 |

temperatura gemelo min temperatura gemelo maximo derecho c temperatura gemelo media de

|      |      |      |
|------|------|------|
| 26,9 | 31,6 | 30,8 |
| 30,9 | 32,4 | 31,3 |
| 28,5 | 31,3 | 29,5 |
| 29,9 | 32,2 | 30,9 |
| 28,9 | 30,9 | 31,3 |
| 27,8 | 29,9 | 29,3 |
| 25,9 | 28,6 | 26,8 |
| 30   | 32,2 | 31,6 |
| 27,8 | 29,7 | 29,3 |
| 28,2 | 31,3 | 29,8 |
| 28,4 | 29,4 | 29   |
| 30,9 | 31,4 | 31   |
| 28,4 | 31,3 | 29,8 |
| 29,9 | 32,9 | 31,9 |
| 29,9 | 31,6 | 30,9 |
| 28,9 | 30,9 | 29,9 |
| 27,8 | 30   | 28,6 |
| 29,9 | 31,5 | 30,5 |
| 28,5 | 29,8 | 29,3 |
| 25,8 | 28,5 | 27   |
| 25,7 | 31,2 | 28,3 |

temperatura tendon aqui temperatura tendon aquiles n temperatura t temperatura t temperatura t

|      |      |      |      |      |
|------|------|------|------|------|
| 19   | 29,6 | 24,8 | 20,5 | 30,8 |
| 20,1 | 31,8 | 27,2 | 20,6 | 31,7 |
| 20,8 | 29,7 | 26,3 | 20,1 | 30   |
| 25,4 | 32,4 | 30,9 | 23,9 | 32   |
| 24   | 30,4 | 29,9 | 24,1 | 31,1 |
| 25,9 | 31,8 | 29,7 | 25,1 | 31,9 |
| 22,9 | 28,3 | 26,1 | 23,9 | 27,7 |
| 25,3 | 31,6 | 29,1 | 25,9 | 31,7 |
| 22,9 | 27,9 | 25,9 | 23,1 | 28,1 |
| 25,9 | 29,6 | 27,9 | 24,8 | 29,8 |
| 23,9 | 29   | 27,9 | 25,1 | 30,7 |
| 27,1 | 31,3 | 29,8 | 27,3 | 32,1 |
| 27,9 | 33,3 | 30,2 | 29,3 | 33,4 |
| 27,9 | 31,9 | 29,8 | 27,8 | 33,2 |
| 29,9 | 33,8 | 31,9 | 27,5 | 31,9 |
| 26,5 | 31,9 | 32,6 | 28,9 | 31,8 |
| 25,5 | 29,7 | 28   | 24,3 | 28,6 |
| 25,6 | 31,5 | 30,5 | 25,8 | 31,5 |
| 23,9 | 29,9 | 28,5 | 24,9 | 29,9 |
| 26,2 | 29,4 | 28,5 | 26,4 | 28,8 |
| 25,4 | 32,4 | 29,9 | 27,8 | 31,3 |

temperatura t Diferencia des Diferencia des Diferencia des Diferencia des Diferencia des Diferencia des

|      |      |      |      |      |      |      |
|------|------|------|------|------|------|------|
| 27   | 3,8  | -0,3 | -1,2 | 3,3  | -2,4 | -1,6 |
| 27,7 | 2    | -0,1 | 0,5  | 0,8  | 0,3  | 0,9  |
| 26   | 1    | -1   | -0,9 | -2,3 | -0,2 | -0,5 |
| 30,1 | -0,4 | 1,1  | 0,6  | 0,9  | 2,6  | 1,9  |
| 29,8 | 0,4  | 0    | -0,3 | 0,4  | -0,2 | -0,3 |
| 28,5 | -1,5 | -1,1 | -2,3 | -0,8 | -2,4 | -2   |
| 26,3 | -1,8 | -1,8 | -2,1 | -0,3 | -0,4 | -0,7 |
| 29,8 | -0,8 | 1    | 0,4  | 0,6  | 0,3  | 0,3  |
| 25,7 | 0,9  | -1,3 | -1,2 | -1,3 | -1,1 | -1,2 |
| 28,2 | 0,9  | 0,1  | -0,2 | -1,5 | -0,8 | -0,9 |
| 28,7 | -3,1 | -3   | -2,7 | -1,1 | 0    | 0,2  |
| 31,7 | -2,5 | -2,5 | -2,9 | -1,5 | -1,2 | -1,3 |
| 30,7 | -5,3 | -4,5 | -4,9 | -7   | -4,5 | -6,3 |
| 31,1 | 0    | 0,5  | 0,1  | 0,2  | 0,9  | 1,3  |
| 30,1 | -7,5 | -4,7 | -6   | -3   | -1,5 | -1,9 |
| 31,8 | 0    | -1   | -1,4 | -1   | -0,4 | -0,9 |
| 27,3 | -5,1 | -2,5 | -4,2 | -3,9 | -2,7 | -3,6 |
| 29,7 | 1,4  | 0,9  | 0,8  | -0,2 | 0,8  | 0,5  |
| 28,8 | 0    | 1,3  | 0,6  | -0,3 | 1,1  | 0,5  |
| 28,1 | -1,4 | -2,3 | -3,1 | -4,9 | -2,6 | -3,8 |
| 29,5 | 0,7  | 1,3  | 2,1  | 1    | 0,3  | 0,3  |

Diferencia des Diferencia des Diferencia des Diferencia des Diferencia des Diferencia des Diferencia des

|      |      |      |      |      |      |      |
|------|------|------|------|------|------|------|
| 2,2  | -0,6 | 0,2  | 1    | -1,2 | 0,2  | 2,3  |
| 3,3  | 0,8  | 0,8  | 1,4  | 1,3  | 0,9  | 0,6  |
| -0,4 | 1,4  | 0    | 0    | 1,2  | 0,4  | 0,1  |
| 0    | 0,3  | 0,4  | 0,2  | -0,2 | -0,3 | 2,8  |
| -1,4 | -0,1 | -0,8 | 0,4  | 0,3  | 1,7  | 2,3  |
| -0,7 | -1,2 | -1,1 | -2,3 | -1,2 | -1,4 | 1,6  |
| -0,6 | -0,3 | -0,8 | -0,8 | -0,4 | -1   | 1,2  |
| 5,5  | 0,9  | 1,4  | 2,1  | 0,9  | 1,3  | 2,7  |
| -1,9 | -1,9 | -1,5 | -1,7 | -1,3 | -0,9 | 1,7  |
| 0    | -0,1 | 0,2  | -0,6 | 1,1  | 0,2  | 2,4  |
| -0,5 | -0,6 | -0,6 | -1,1 | -1,3 | -1,3 | 0,7  |
| -0,9 | 0,6  | -0,2 | 0,4  | -0,8 | -0,7 | 2,6  |
| -0,8 | -2,9 | -0,7 | -1,1 | -0,5 | -0,5 | 2,5  |
| 0,8  | 2,9  | 1,3  | 0    | 2,2  | 1,7  | 3,7  |
| -0,4 | 0,5  | 0    | 0,6  | 0,6  | 0,8  | -0,3 |
| -0,2 | 0,3  | -0,4 | -0,5 | -0,1 | -0,6 | 1,8  |
| -2,3 | -0,8 | -1,8 | -2,6 | -2,1 | -2,8 | 0,2  |
| 1,3  | 1,1  | 1,1  | 1,6  | 1,2  | 1,1  | 3,1  |
| 2,3  | 0,8  | 1,2  | 0,6  | 0,2  | 0,8  | 2,3  |
| -4,2 | -2,6 | -3,7 | -3,5 | -4   | -3,7 | 5,7  |
| 0,2  | 1,1  | 0,9  | 1,9  | 1,2  | 0,4  | 2    |

Diferencia des Diferencia des Diferencia des Diferencia des Diferencia despues-antes med aquiles dere

|      |      |      |      |      |
|------|------|------|------|------|
| -1,6 | -0,9 | 0,8  | -0,7 | 0,7  |
| 3,3  | 1,8  | 0,9  | 1,2  | 2,4  |
| 0,5  | 0,4  | -2   | 1,3  | 0,4  |
| 1,8  | 4,3  | 2    | 3,5  | 2,8  |
| 1,9  | 3,7  | 1,8  | 2,2  | 3,3  |
| 0,9  | 0,9  | 2,6  | 1,2  | 0,6  |
| 0,5  | 1,7  | 1,4  | 1,7  | 1,3  |
| 3,3  | 2,3  | 2,1  | 2,4  | 2,5  |
| 1    | 1,6  | 1,4  | 1    | 1,8  |
| 2,4  | 2,1  | 1,3  | 1,7  | 2,1  |
| 0,8  | 0,9  | 3    | 2,1  | 2,5  |
| 1,1  | 1,2  | 4,2  | 1,2  | 2,7  |
| 2,2  | 1,5  | 2,3  | 1,9  | 0,8  |
| 2,8  | 2,2  | 2,7  | 1,9  | 2,3  |
| 2,6  | 1,2  | 5,2  | 3,4  | 4,9  |
| 2,3  | 4,5  | 4    | 1,7  | 0,5  |
| -1,9 | -0,1 | -1,4 | -2,6 | -0,7 |
| 1,7  | 4,2  | 4,4  | 2    | 3,6  |
| 4,8  | 4,6  | 2,9  | 1,5  | 4,5  |
| -0,2 | 2,7  | 4,4  | -1,2 | 2,1  |
| 2,9  | 3,6  | 2,4  | 0,1  | 1,7  |

cho
